# Supplementary material for: Do You Think I Am Living Well? A Four-Season Hair Cortisol Analysis on Leisure Horses in Different Housing and Management Conditions
Source: MDPI journal article supplement (doi:10.3390/ani11072141), 2021-07-20
Supplement: s1 [file s1]

| Horse # | Stable # | Group              | Age | Gender | Breed            | Coat color    | blanket |
|---------|----------|--------------------|-----|--------|------------------|---------------|---------|
| 1       | 1        | Mixed management   | 15  | M      | paint horse      | piebald (b/w) | yes     |
| 2       | 1        | Mixed management   | 11  | F      | quarter horse    | dark bay      | yes     |
| 3       | 1        | Mixed management   | 9   | M      | sella italiano   | bay           | no      |
| 4       | 1        | Mixed management   | 16  | M      | sella italiano   | bay           | no      |
| 5       | 1        | Mixed management   | 18  | F      | dutch warmblood  | chestnut      | yes     |
| 6       | 1        | Mixed management   | 14  | M      | selle français   | chestnut      | yes     |
| 7       | 2        | Mixed management   | 14  | F      | sella italiano   | bay           | yes     |
| 8       | 2        | Mixed management   | 14  | F      | sella italiano   | gray          | yes     |
| 9       | 2        | Mixed management   | 1,5 | M      | sella italiano   | bay           | no      |
| 10      | 2        | Mixed management   | 1,5 | M      | trotter          | chestnut      | no      |
| 11      | 2        | Mixed management   | 1,5 | M      | trotter          | black         | no      |
| 12      | 2        | Mixed management   | 1,5 | M      | trotter          | bay           | no      |
| 13      | 3        | Natural management | 14  | M      | paint horse      | piebald (b/w) | no      |
| 14      | 3        | Natural management | 14  | F      | thoroughbred     | dark bay      | no      |
| 15      | 3        | Natural management | 21  | F      | quarter horse    | chestnut      | no      |
| 16      | 3        | Natural management | 12  | M      | maremmano        | dark bay      | no      |
| 17      | 3        | Natural management | 14  | F      | thoroughbred     | gray          | no      |
| 18      | 3        | Natural management | 9   | M      | spagnolo         | chestnut      | no      |
| 19      | 3        | Natural management | 17  | M      | paint horse      | piebald (b/w) | no      |
| 20      | 3        | Natural management | 21  | M      | sella italiano   | chestnut      | no      |
| 21      | 3        | Natural management | 25  | F      | quarter/trotter  | bay           | no      |
| 22      | 3        | Natural management | 30  | M      | argentino        | roan          | no      |
| 23      | 3        | Natural management | 20  | F      | arabian horse    | gray          | no      |
| 24      | 3        | Natural management | 22  | M      | sella italiano   | chestnut      | no      |
| 25      | 3        | Natural management | 25  | M      | thoroughbred     | chestnut      | no      |
| 26      | 3        | Natural management | 25  | F      | selle français   | bay           | no      |
| 27      | 3        | Natural management | 10  | M      | quarter horse    | chestnut      | no      |
| 28      | 3        | Natural management | 8   | F      | thoroughbred     | gray          | no      |
| 29      | 1        | Paddock            | 22  | F      | hanoverian horse | bay           | no      |
| 30      | 1        | Paddock            | 3   | F      | sella italiano   | bay           | no      |
| 31      | 1        | Paddock            | 21  | M      | thoroughbred     | gray          | no      |
| 32      | 1        | Paddock            | 3   | F      | selle français   | black         | no      |
| 33      | 1        | Paddock            | 3   | M      | selle français   | bay           | no      |
| 34      | 1        | Paddock            | 3   | F      | sella italiano   | chestnut      | no      |
| 35      | 1        | Paddock            | 21  | M      | thoroughbred     | gray          | no      |
| 36      | 1        | Paddock            | 15  | F      | dutch warmblood  | chestnut      | no      |
| 37      | 1        | Paddock            | 3   | M      | thoroughbred     | black         | no      |
| 38      | 1        | Paddock            | 12  | F      | selle français   | chestnut      | no      |
| 39      | 1        | Paddock            | 18  | M      | hanoverian horse | chestnut      | no      |

|    |   |         |    |   |                |               |     |
|----|---|---------|----|---|----------------|---------------|-----|
| 40 | 2 | Paddock | 3  | F | trotter        | bay           | no  |
| 41 | 2 | Paddock | 8  | M | trotter        | chestnut      | no  |
| 42 | 2 | Paddock | 6  | M | paint horse    | piebald (c/w) | no  |
| 43 | 2 | Paddock | 8  | F | paint horse    | piebald (c/w) | no  |
| 44 | 2 | Paddock | 18 | F | trotter        | bay           | no  |
| 45 | 2 | Paddock | 13 | F | trotter        | bay           | no  |
| 46 | 2 | Paddock | 5  | M | sella italiano | bay           | yes |
| 47 | 2 | Paddock | 18 | F | sella italiano | bay           | no  |

**Table S1.** Main characteristics of horses enrolled, their stables and their division into groups.

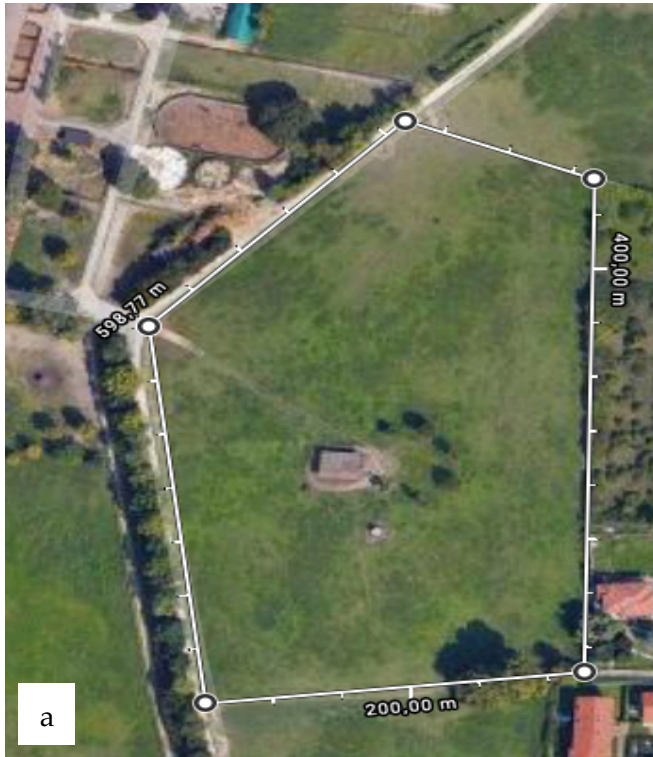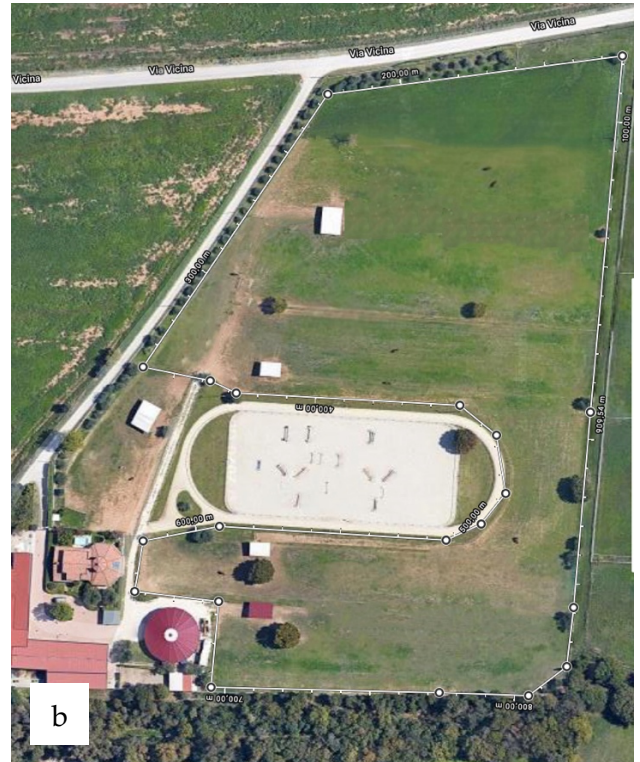

Figure S1. *Mixed management group* paddock areas. In **a**: paddock of Stable 1 (22.763,09 m<sup>2</sup>); in **b**: paddock of Stable 2 (22.841,80 m).

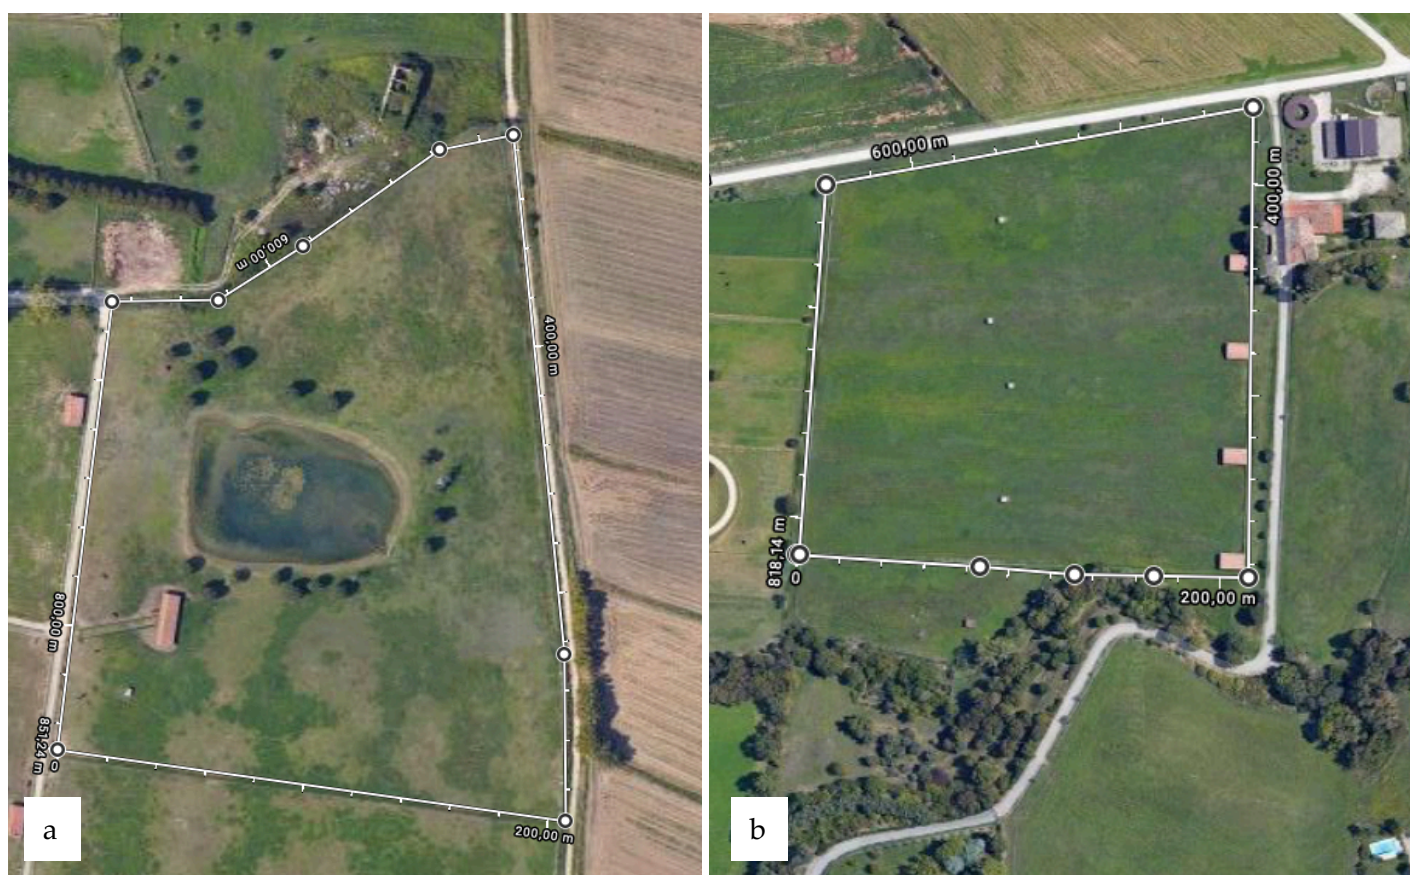

**Figure S2.** Paddock areas of the *Paddock group*. In **a**: paddock of Stable 1 (42.799,97 m<sup>2</sup>); in **b**: paddock of Stable 2 (45.582,59 m<sup>2</sup>).



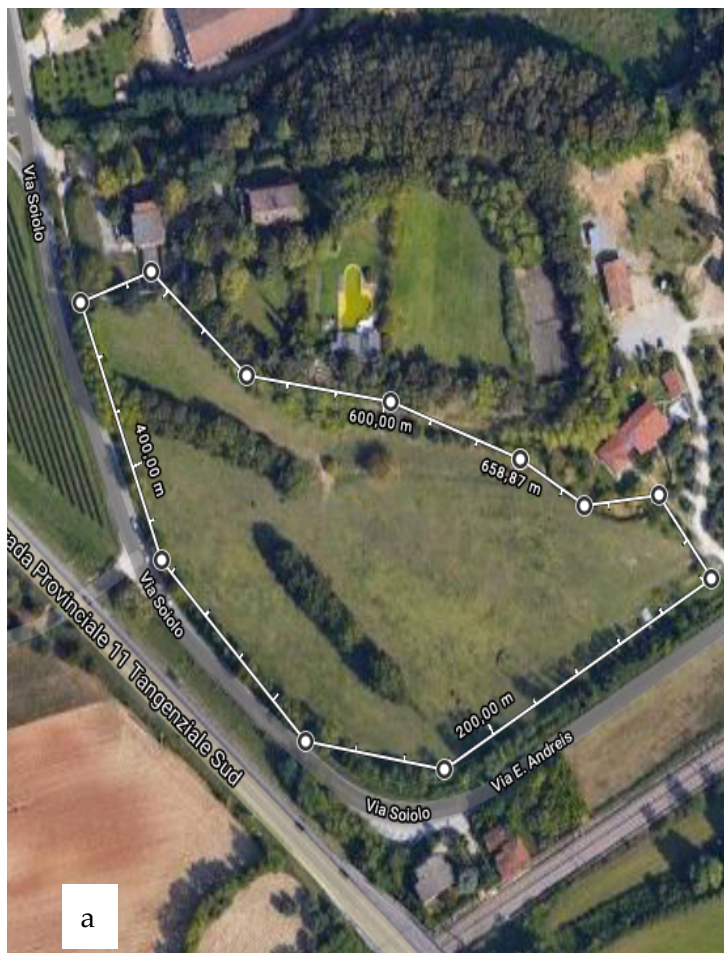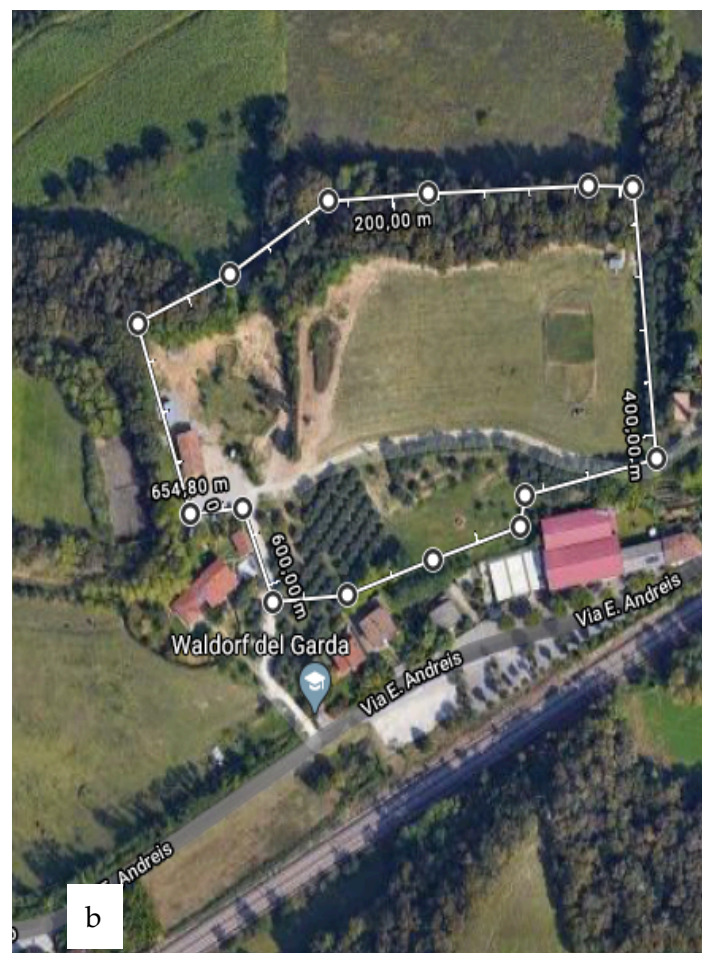

**Figure S3.** Paddock area of the *Natural management* group, both in Stable 3. Horses were free to move from one paddock (a; 21.479,86 m<sup>2</sup>) to the other (b; 25.783,04 m<sup>2</sup>) through a gate, which could be closed if deemed necessary.
